# Supplementary material for: Graph-based deep fusion for architectural text representation
Source: PeerJ Comput Sci. 2025 Mar 19;11:e2735. doi: 10.7717/peerj-cs.2735 (PMC11935773; doi:10.7717/peerj-cs.2735)
Supplement: Supplemental Information 2 [file peerj-cs-11-2735-s002.xlsx]

## Sheet: Sheet1
Methods		Architecture				News
		Accuracy	Precision	Recall	F1-score	Accuracy	Precision	Recall	F1-score
Word3vec		0.6041	0.5651	0.528	0.5091	0.9002	0.8709	0.7482	0.77
BERT		0.5571	0.5537	0.5035	0.5091	0.9072	0.8253	0.8283	0.8241
XLNet		0.5503	0.5082	0.5084	0.4962	0.9059	0.8219	0.8498	0.8343
SentenceTransformer		0.5663	0.5143	0.4881	0.4913	0.8799	0.8146	0.773	0.7905
BERT+GCN		0.59011	0.5746	0.5062	0.5382	0.8547	0.8991	0.8234	0.8663
BERT+RoBERTa+GAT		0.6322	0.6091	0.5778	0.5845	0.9539	0.9113	0.9049	0.9081
